# Supplementary material for: Peptide Toxins from Antarctica: The Nemertean Predator and Scavenger Parborlasia corrugatus (McIntosh, 1876)
Source: MDPI journal article supplement (doi:10.3390/toxins16050209), 2024-04-30
Supplement: s1 [file s1]

# Supplementary Materials: Peptide Toxins from Antarctica: The Nemertean Predator and Scavenger *Parborlasia corrugatus* (McIntosh, 1876)

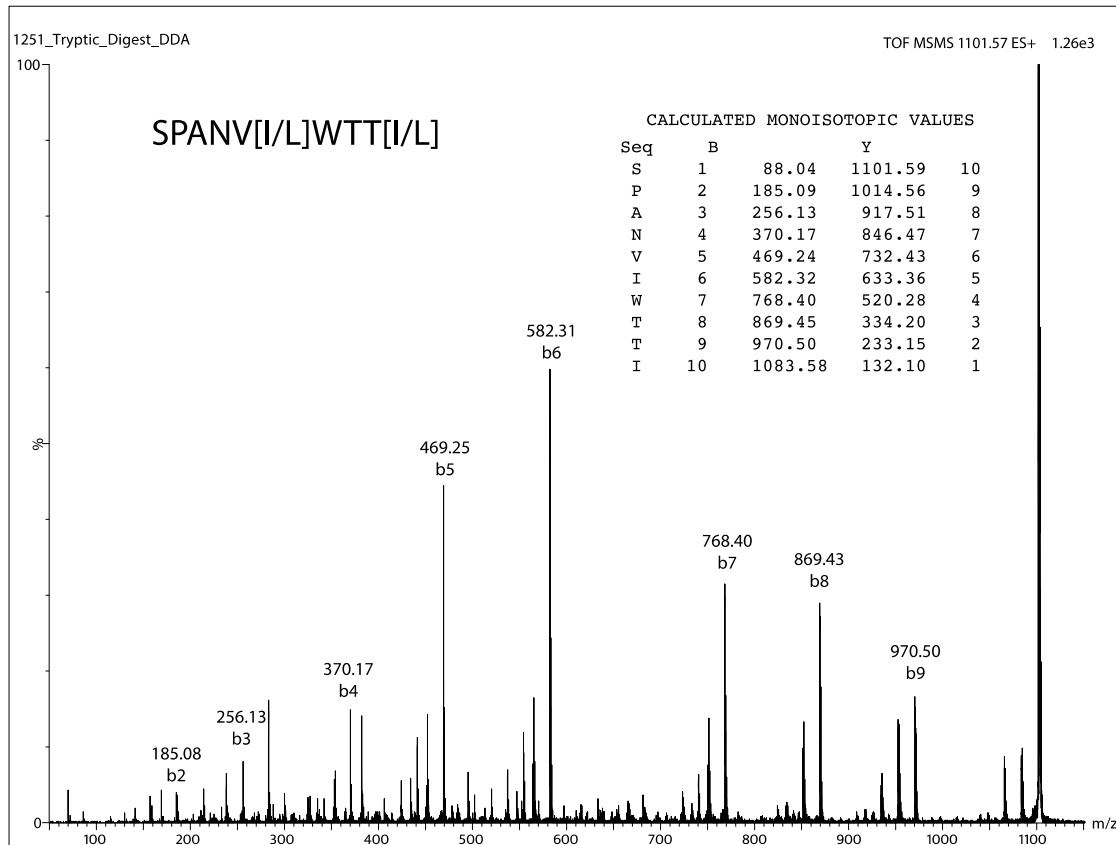

**Supplementary Figure S1.** De novo sequencing of 1101 fragment. The sequence of the 1101 fragment was found to correspond to SPANV[I/L]WTT[I/L] (positions 75-84) by MSMS de novo sequencing.
